# Supplementary material for: The Long-Term Effects of Acupuncture on Hippocampal Functional Connectivity in aMCI with Hippocampal Atrophy: A Randomized Longitudinal fMRI Study
Source: Hindawi journal article supplement (doi:10.1155/2020/6389368), 2020-02-10
Supplement: f1 [file 6389368.f1.docx]

**Supplementary materials**

**Figure 1**. Whole brain functional connectivity of left hippocampus (a) and right hippocampus (b) within HC at baseline respectively. Colorbar indicates t-value.


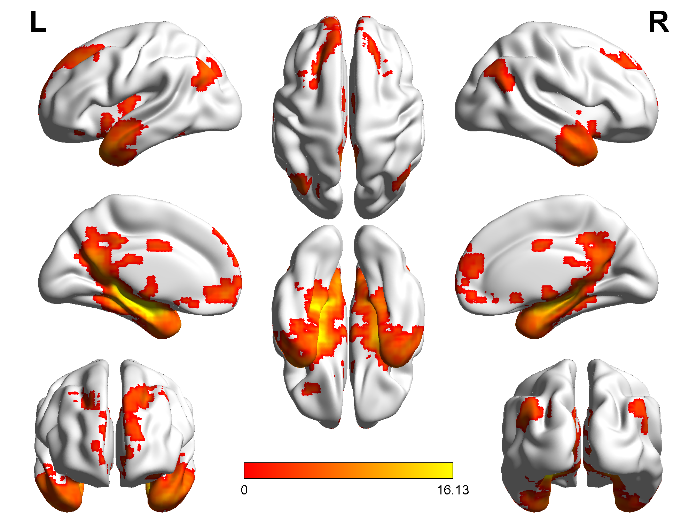

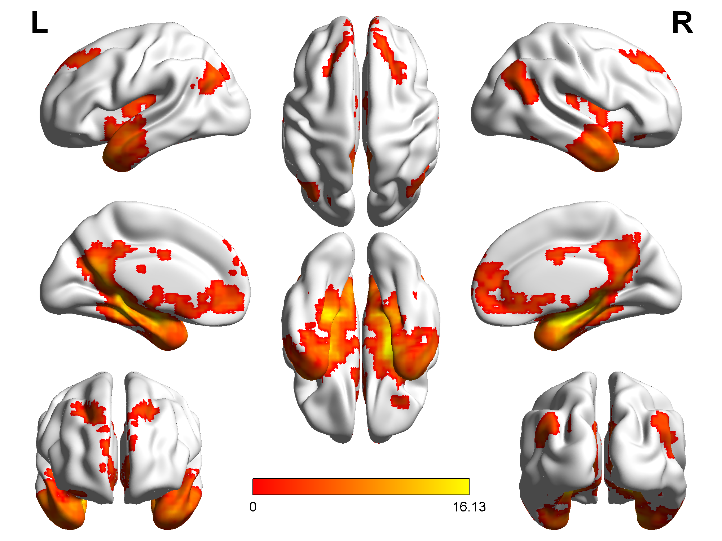
(a) (b)

**Figure 2**. Whole brain functional connectivity of left hippocampus (a) and right hippocampus (b) within aMCI at baseline respectively. Colorbar indicates t-value.

(a) (b)


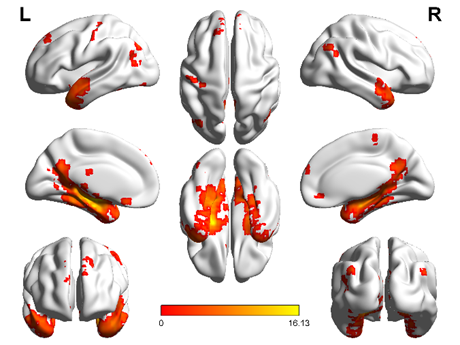

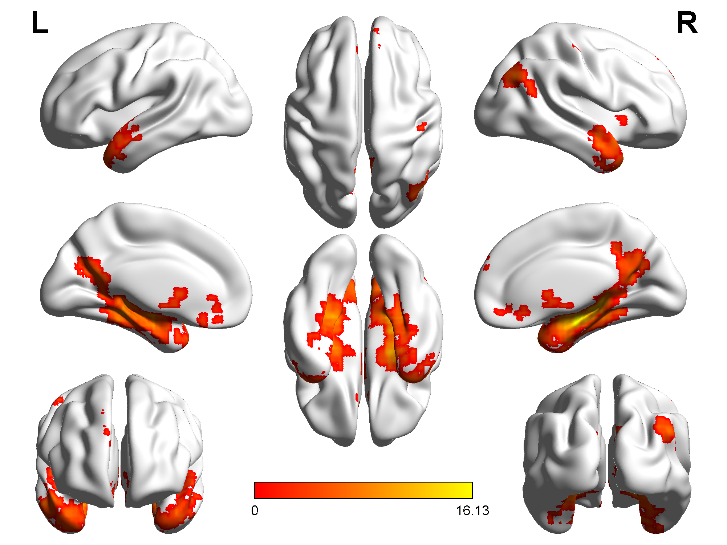


**Figure 3**. Whole brain functional connectivity of left hippocampus within aMCI acupuncture group (a) and aMCI control group (b) at baseline respectively. Colorbar indicates t-value.


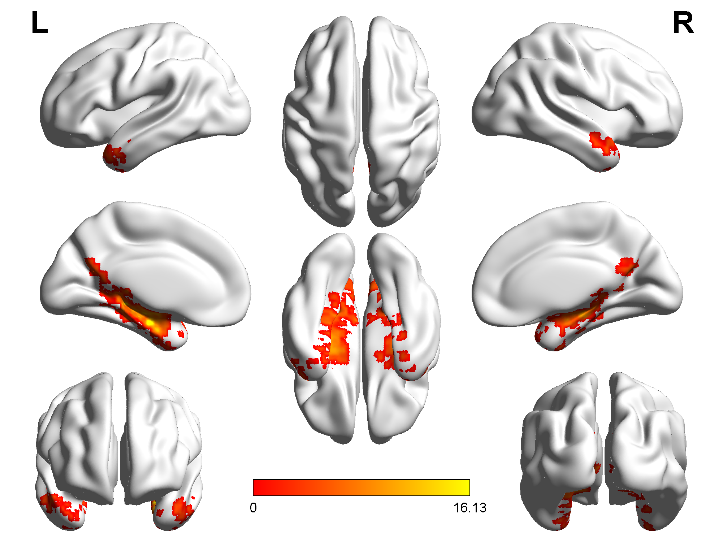

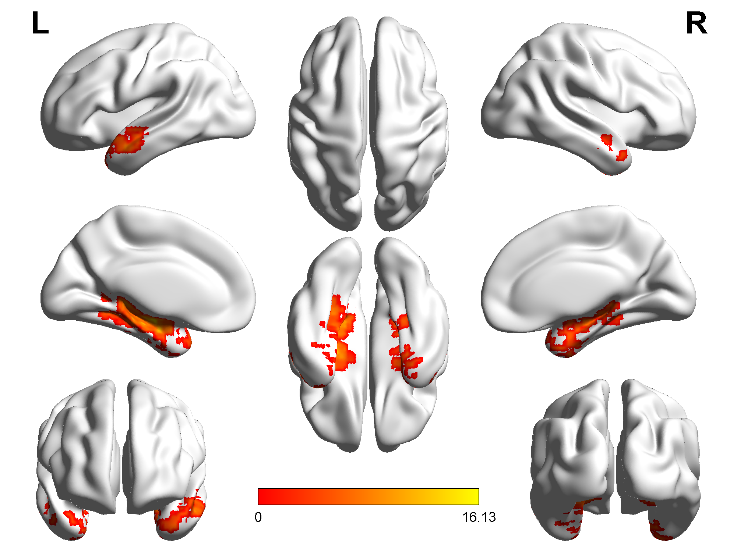
(a) (b)

**Figure 4**. Whole brain functional connectivity of left hippocampus within aMCI acupuncture group (a) and aMCI control group (b) at follow-up respectively. Colorbar indicates t-value.


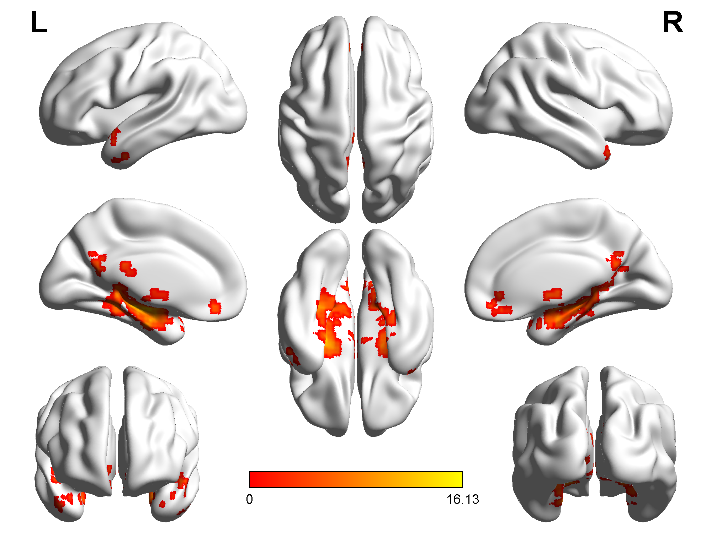

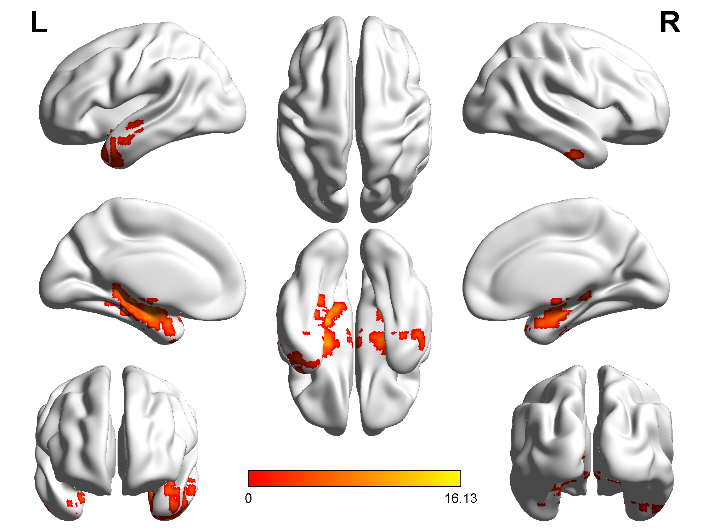
(a) (b)

**Figure 5**. Whole brain functional connectivity of right hippocampus within aMCI acupuncture group (a) and aMCI control group (b) at baseline respectively. Colorbar indicates t-value.


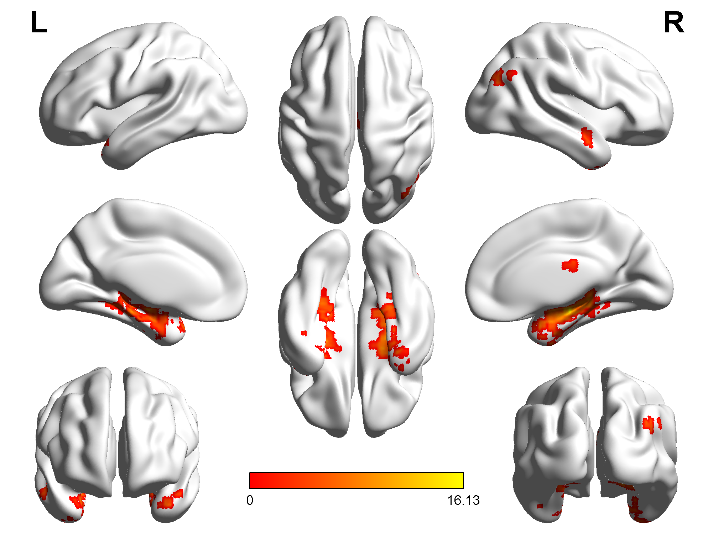

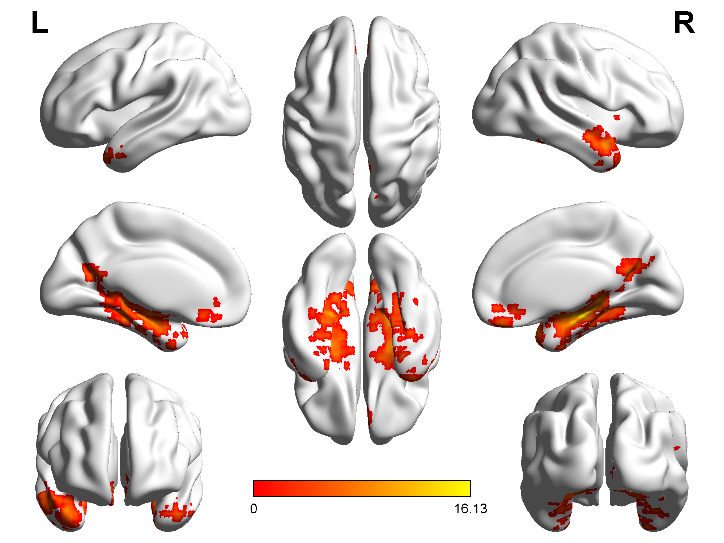
(a) (b)

**Figure 6**. Whole brain functional connectivity of right hippocampus within aMCI acupuncture group (a) and aMCI control group (b) at follow-up respectively. Colorbar indicates t-value.


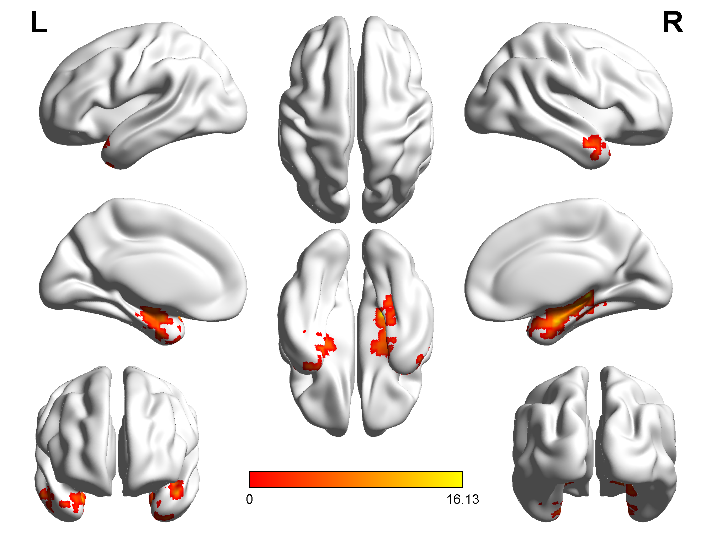

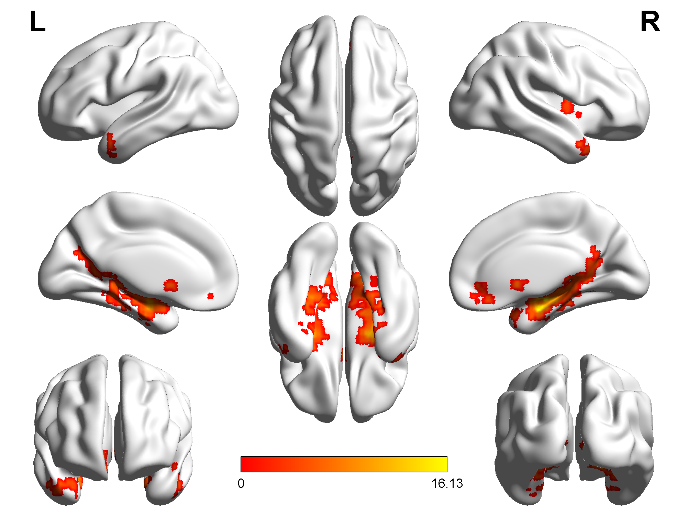
(a) (b)

Table 1. Clinical characteristics of subjects with amnestic mild cognitive impairment (aMCI) and healthy control (HC).

|  | HC(n=50) | aMCI(n=28) | *p* value | aMCI-CO(n=13) | aMCI-AC(n=12) | *p* value |
| --- | --- | --- | --- | --- | --- | --- |
| Age (year) | 65.8±7.2 | 66.8±9.4 | 0.61 | 65.0±10.1 | 67.5±9.7 | 0.52 |
| Gender (M/F) | 24/26 | 17/11 | 0.28 | 7/6 | 8/4 | 0.51 |
| Education (year) | 10.9±3.0 | 10.5±4.1 | 0.62 | 10.0±3.2 | 11.7±4.9 | 0.32 |
| Volume of Lt.HP | 0.49±0.03 | 0.46±0.05 | 0.01 | 0.46±0.02 | 0.46±0.06 | 0.86 |
| Volume of Rt.HP | 0.46±0.03 | 0.43±0.05 | <0.01 | 0.43±0.03 | 0.44±0.05 | 0.89 |
| CDR | 0 | 0.5 | <0.001 | 0.5 | 0.5 | 1 |
| MMSE | 28.5±1.2 | 25.1±3.2 | <0.001 | 25.4±3.7 | 25.0±3.1 | 0.74 |
| MoCA | 27.2±1.5 | 20.9±4.0 | <0.001 | 22.1±4.2 | 20.5±3.7 | 0.34 |
| AVLT-immediate | 9.3±1.8 | 6.3±1.4 | <0.001 | 6.5±1.8 | 6.3±0.9 | 0.76 |
| AVLT-delay | 9.9±2.9 | 3.8±3.1 | <0.001 | 4.5±3.0 | 3.1±3.4 | 0.29 |
| AVLT-recognition | 11.9±2.4 | 6.8±3.3 | <0.001 | 7.2±4.1 | 6.8±2.8 | 0.78 |

Values represent means ± SD; aMCI-CO, aMCI control group; aMCI-AC, aMCI acupuncture group; Lt., left; Rt., right; HP, hippocampus; CDR, clinical dementia rate; MMSE, mini mental state examination; MoCA, montreal cognitive assessment; AVLT, auditory verbal learning test; p-values were derived from Student t-tests comparing the two groups, except for “gender” where the p-value was obtained using the ­chi-square test.
